# Supplementary material for: Emerging models for Italian SMEs internationalization: the Platform India case.
Source: Royal Society of Chemistry journal article supplement (doi:10.1039/c0ob00630k), 2013-01-01

## SUPPLEMENTARY INFORMATION

### The first C-glycosidic analogue of a novel galactosyltransferase inhibitor

Karine Descroix<sup>1</sup> and Gerd K. Wagner<sup>1,2\*</sup>

<sup>1</sup>*School of Pharmacy, University of East Anglia, Norwich, NR4 7TJ, UK*

<sup>2</sup>*Current address: King's College London, School of Biomedical Sciences, Division of Pharmaceutical Sciences, Franklin-Wilkins Building, 150 Stamford Street, London SE1 9NH.*

*Fax: +44 (0)20 7848 4747; phone: +44 (0)20 7848 4045; e-mail: [gerd.wagner@kcl.ac.uk](mailto:gerd.wagner@kcl.ac.uk)*

*\*Correspondence should be addressed to G.K.W.*

#### Table of Contents

|                                          |     |
|------------------------------------------|-----|
| Preparation of synthetic precursors..... | S2  |
| NMR spectra of <b>2</b> .....            | S3  |
| NMR spectra of <b>3</b> .....            | S5  |
| NMR spectra of <b>4</b> .....            | S6  |
| NMR spectra of <b>5a</b> .....           | S7  |
| NMR spectra of <b>5b</b> .....           | S9  |
| NMR spectra of <b>6</b> .....            | S10 |
| NMR spectra of <b>7</b> .....            | S11 |
| NMR spectra of <b>9</b> .....            | S13 |
| NMR spectra of <b>11</b> .....           | S14 |
| NMR spectra of <b>12</b> .....           | S15 |

Galactose pentaacetate and galactosyl bromide **4** were prepared, with modifications, as described by M.L. Wolfrom and A. Thompson in: "Methods in Carbohydrate Chemistry Vol. II", R.L. Whistler, M.L. Wolfrom and J.N. BeMiller (Eds), Academic Press, New York, 1963, pp. 211–215:

**1,2,3,4,6-penta-O-acetyl-( $\alpha,\beta$ )-D-galactopyranose.** Acetic anhydride acetic (70 mL, 740.5 mmol) was added dropwise to a solution of  $\alpha$ -D-galactose (5.0 g, 27.8 mmol) in anhydrous pyridine (70 mL). The reaction was stirred under nitrogen for 20 hours at room temperature, at which point TLC showed the complete disappearance of starting material. The mixture was concentrated under reduced pressure, and volatiles were removed by repeated co-evaporation with toluene. The residue was purified by column chromatography (cyclohexane/EtOAc, 6:4) to give a mixture of anomers ( $\alpha:\beta = 3:1$ ) of the title compound as a colourless oil (10.5 g, 97%):  $R_f$  0.6 (cyclohexane/EtOAc 1:1);  $\delta_H$  (400 MHz,  $CDCl_3$ ) 6.34 (d,  $1H_\alpha$ ,  $J_{1,2}$  1.6 Hz, H-1 $\alpha$ ), 5.66 (d,  $1H_\beta$ ,  $J_{1,2}$  1.6 Hz, H-1 $\beta$ ), 5.46 (dd,  $1H_\alpha$ ,  $J_{3,4} < 1.0$  Hz,  $J_{4,5}$  1.2 Hz, H-4 $\alpha$ ), 5.46 (dd,  $1H_\beta$ ,  $J_{3,4}$  3.4 Hz,  $J_{4,5} < 1.0$  Hz, H-4 $\beta$ ), 5.33-5.27 (m,  $2H_\alpha$  and  $1H_\beta$ , H-2 $\alpha$ , H-3 $\alpha$ , H-2 $\beta$ ), 5.04 (dd,  $1H_\beta$ ,  $J_{2,3}$  10.4 Hz, H-3 $\beta$ ), 4.31 (dt,  $1H_\alpha$ ,  $J_{5,6}$  6.6 Hz, H-5 $\alpha$ ), 4.15-4.00 (m,  $2H_\alpha$  and  $3H_\beta$ , H-6a $\alpha$ , H-6b $\alpha$ , H-5 $\beta$ , H-6a $\beta$ , H-6b $\beta$ ), 2.12, 2.08, 2.00, 1.98, 1.96, 1.95 (all s,  $5H_\alpha$  and  $5H_\beta$ ,  $10 \times C(O)CH_3$ );  $\delta_C$  (100 MHz,  $CDCl_3$ ) 170.6, 170.4, 170.1, 169.2, 167.2 ( $5 \times C=O$ ), 92.3 (C-1 $\beta$ ), 89.9 (C-1 $\alpha$ ), 71.8 (C-5 $\beta$ ), 71.0 (C-3 $\beta$ ), 68.9 (C-5 $\alpha$ ), 67.9 (C-2 $\beta$ ), 67.5 (C-3 $\alpha$  and C4 $\alpha$ ), 66.9 (C-4 $\beta$ ), 66.6 (C-2 $\alpha$ ), 61.4 (C-6 $\alpha$ ), 61.2 (C-6 $\beta$ ), 21.1, 21.0, 20.9, 20.9, 20.8 ( $5 \times C(O)CH_3$ ).

**2,3,4,6-tetra-O-acetyl- $\alpha$ -D-galactopyranosyl bromide (**4**).** At 0 °C, a solution of hydrogen bromide in acetic acid (33%, 5 mL) was added dropwise to 1,2,3,4,6-penta-O-acetyl-( $\alpha,\beta$ )-D-galactopyranose (500 mg, 1.28 mmol). After stirring for 2 hours at room temperature, dichloromethane (30 mL) was added to the reaction. The solution was carefully washed with ice-cold water, and the organic layer was dried over  $MgSO_4$ . The solvent was evaporated under vacuum to afford 1.04 g (98%) of galactosyl bromide **3**:  $R_f$  0.45 (cyclohexane/EtOAc 2:1);  $\delta_H$  (400 MHz,  $CDCl_3$ ) 6.70 (d,  $1H$ ,  $J_{1,2}$  3.6 Hz, H-1), 5.52 (dd,  $1H$ ,  $J_{3,4}$  3.2 Hz,  $J_{4,5}$  1.2 Hz, H-4), 5.41 (dd,  $1H$ ,  $J_{2,3}$  10.4 Hz, H-3), 5.05 (dd,  $1H$ , H-2), 4.49 (m,  $1H$ , H-5), 4.19 (dd,  $1H$ ,  $J_{6a,6b}$  11.6 Hz,  $J_{5,6}$  6.0 Hz, H-6a), 4.04 (dd,  $1H$ ,  $J_{5,6b}$  6.8 Hz, H-6b), 2.15, 2.12, 2.06, 2.02 (all s,  $12H$ ,  $4 \times C(O)CH_3$ );  $\delta_C$  (100 MHz,  $CDCl_3$ ) 167.2 ( $4 \times C=O$ ), 88.3 (C-1), 71.2 (C-5), 68.2, 67.9 (C-3/C-4), 67.2 (C-2), 61.0 (C-6), 20.9, 20.8 ( $4 \times C(O)CH_3$ ).

**Bis(sodium) [2-( $\alpha$ -D-galactopyranosyl)-ethylphosphono]-5-(5-formylthien-2-yl)uridin-5'-yl phosphate (2)** **$^1\text{H}$  NMR ( $\text{D}_2\text{O}$ ):**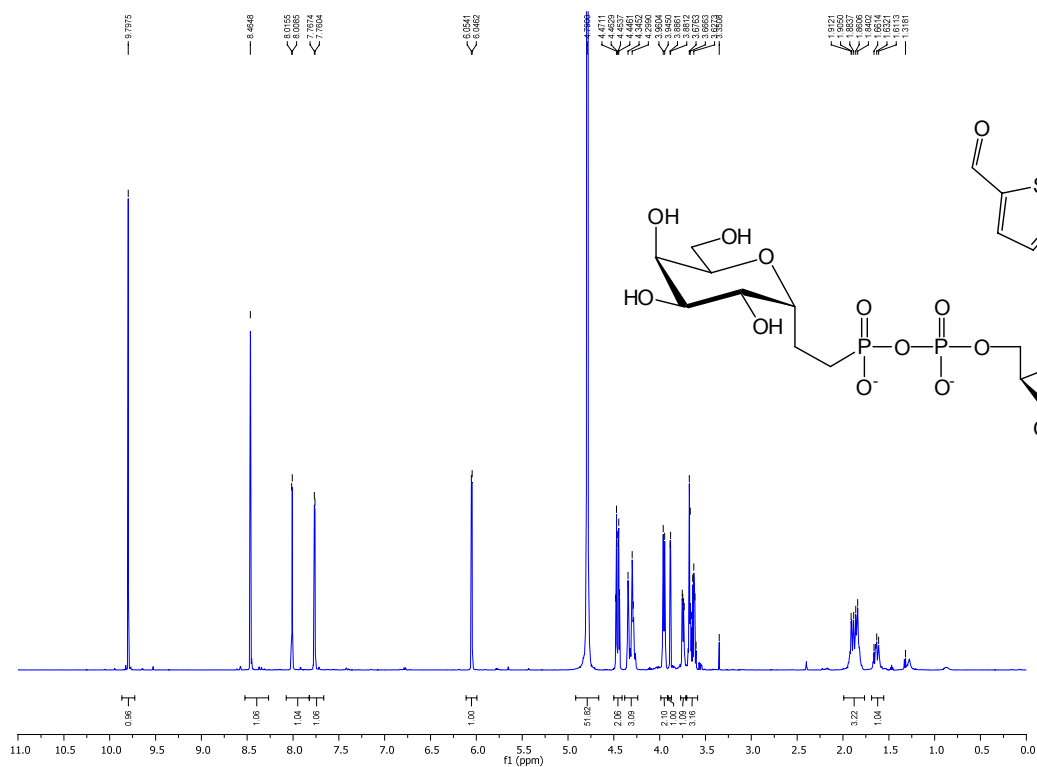 **$^{31}\text{P}$  NMR ( $\text{D}_2\text{O}$ ):**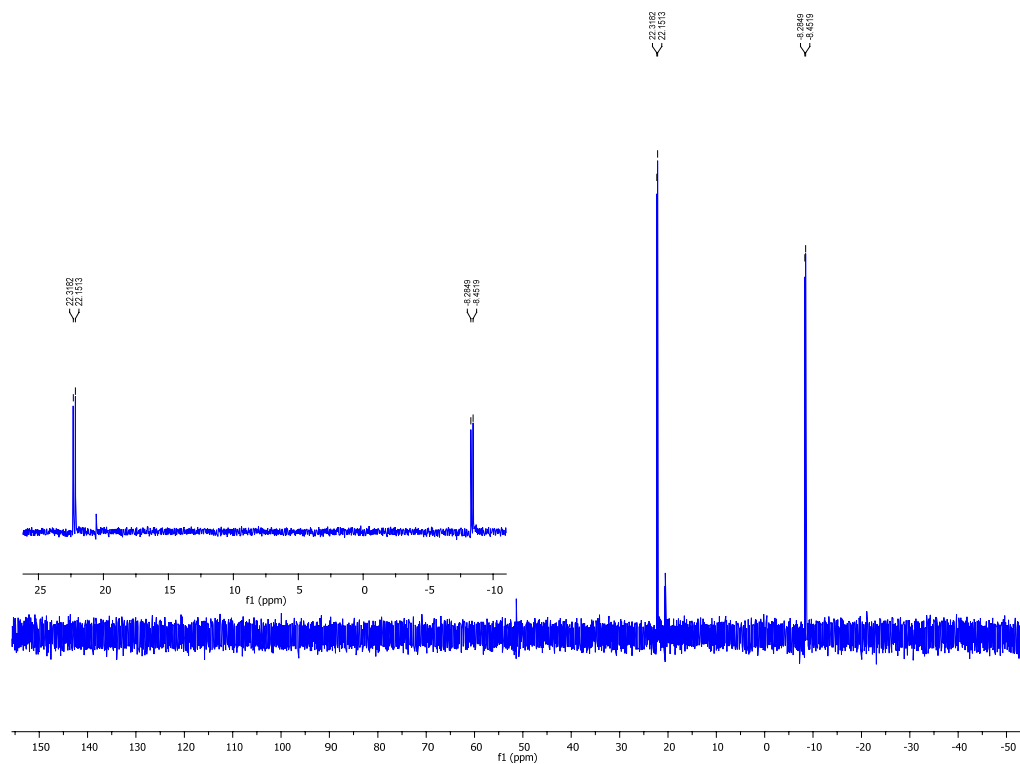

$^{13}\text{C}$  NMR ( $\text{D}_2\text{O}$ ):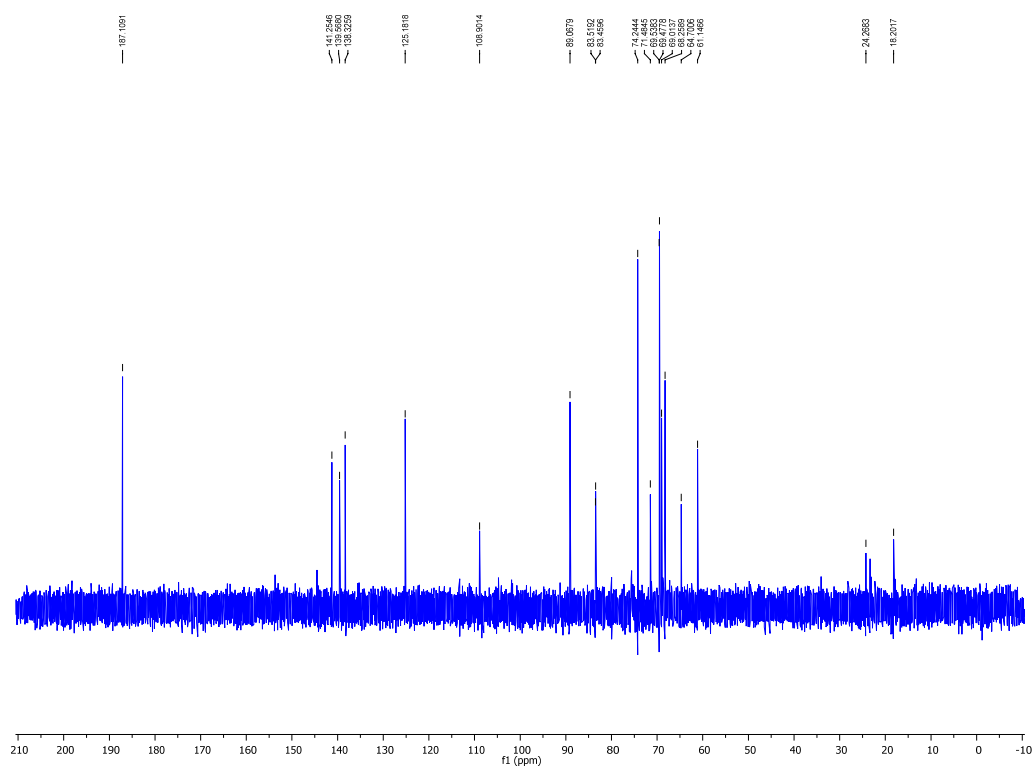

**Bis(triethylammonium) [2-( $\alpha$ -D-galactopyranosyl)-ethylphosphono]uridin-5'-yl phosphate (3)** $^1\text{H}$  NMR ( $\text{D}_2\text{O}$ ):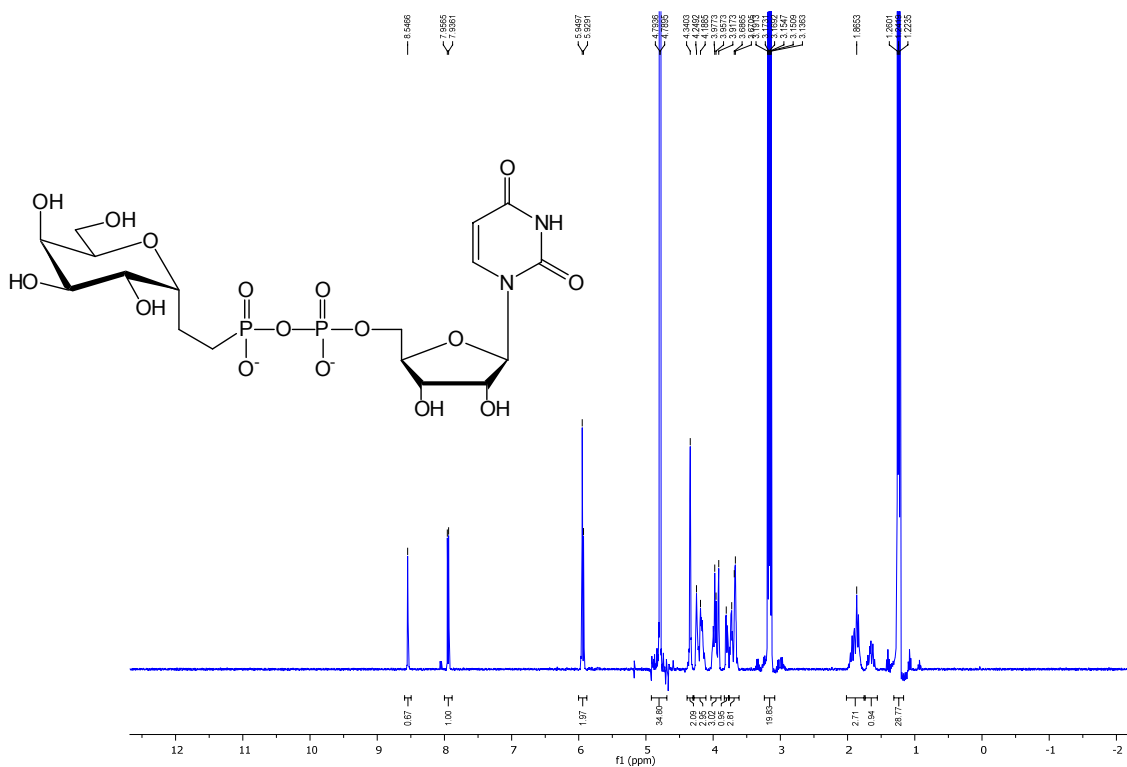 $^{31}\text{P}$  NMR ( $\text{D}_2\text{O}$ ):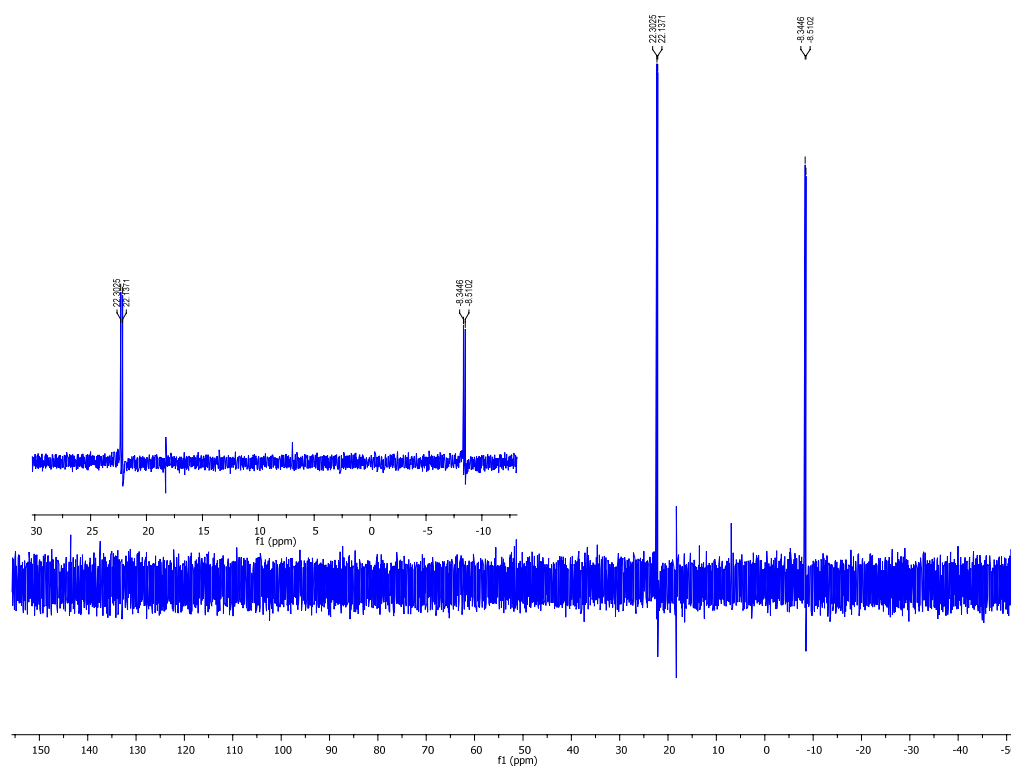









**2,3,4,6-Tetra-O-acetyl- $\alpha$ -D-glucopyranose (5b)** $^1\text{H}$  NMR ( $\text{CDCl}_3$ ):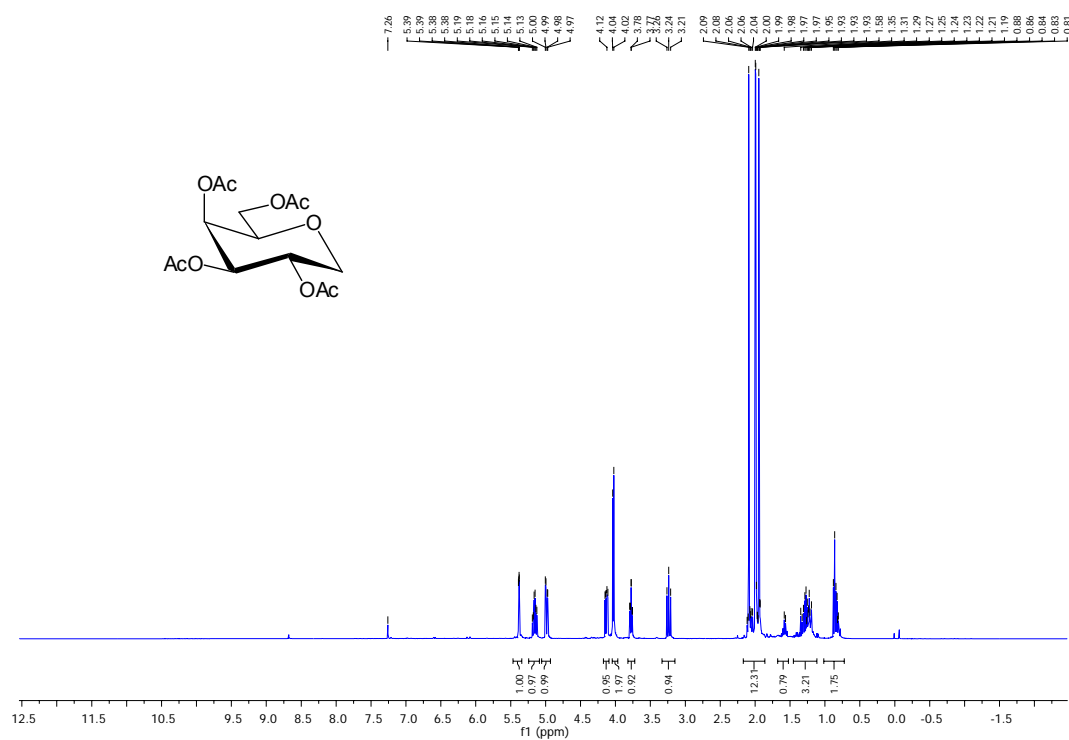 $^{13}\text{C}$  NMR ( $\text{CDCl}_3$ ):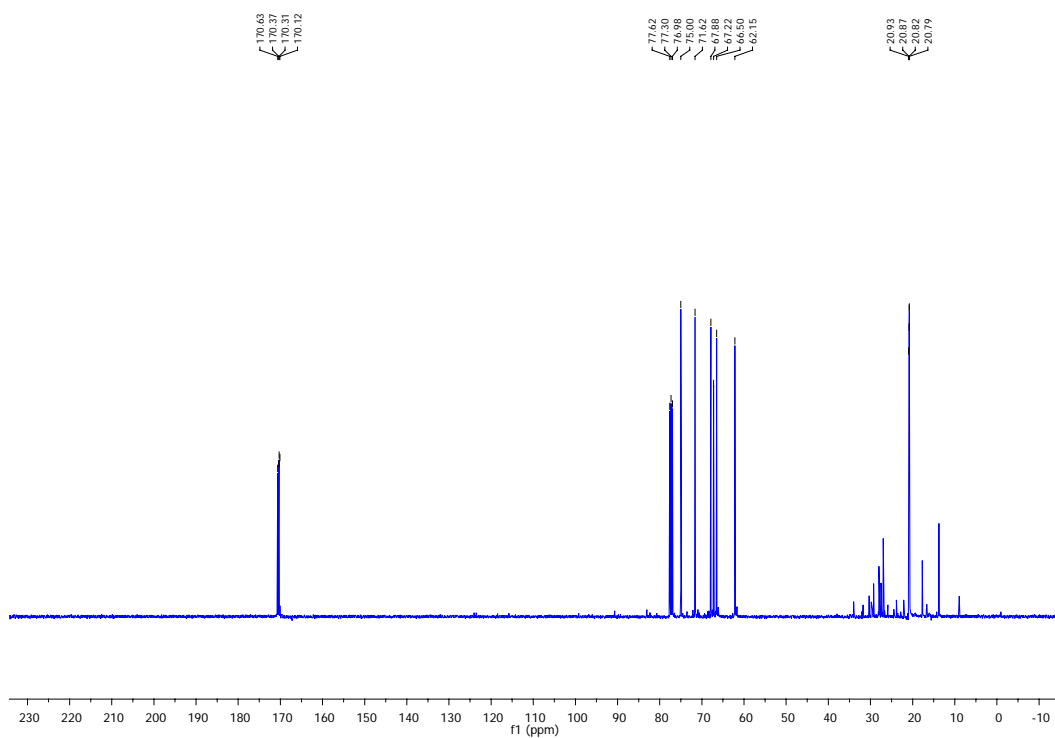

**Bis(triethylammonium) 2-(2,3,4,6-tetra-O-acetyl- $\alpha$ -D-galactopyranosyl)-ethylphosphonate (6)** $^1\text{H}$  NMR ( $\text{D}_2\text{O}$ ):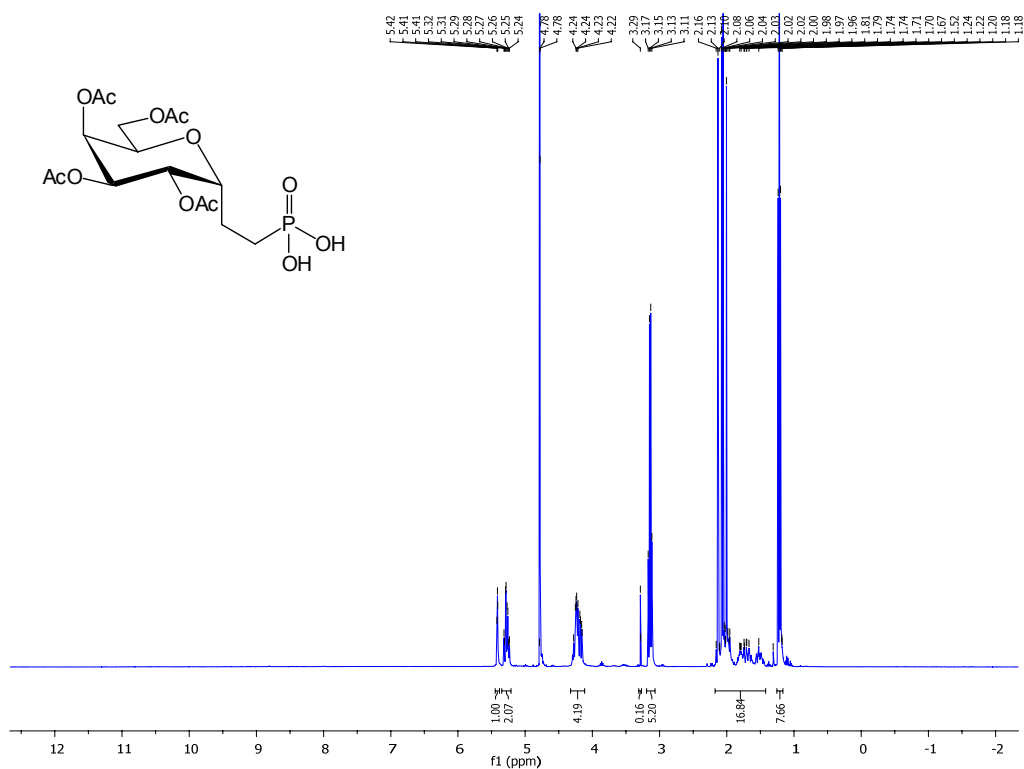 $^{13}\text{C}$  NMR ( $\text{D}_2\text{O}$ ):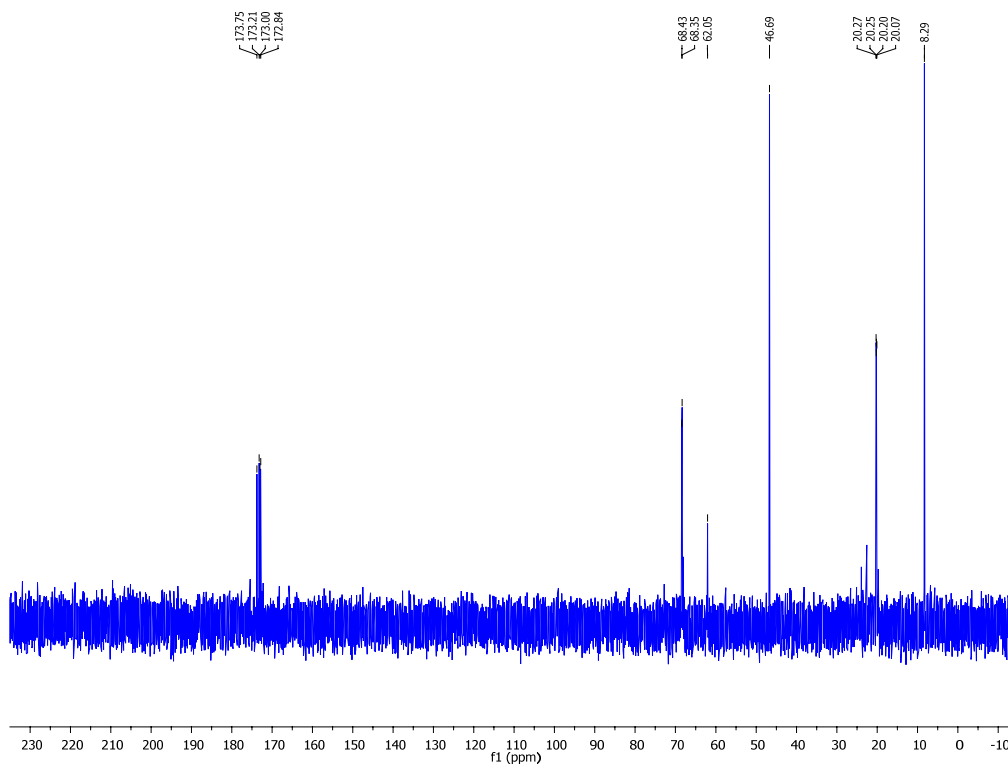

**Bis(triethylammonium) 2-( $\alpha$ -D-galactopyranosyl)-ethylphosphonate (7)** $^1\text{H}$  NMR ( $\text{D}_2\text{O}$ ):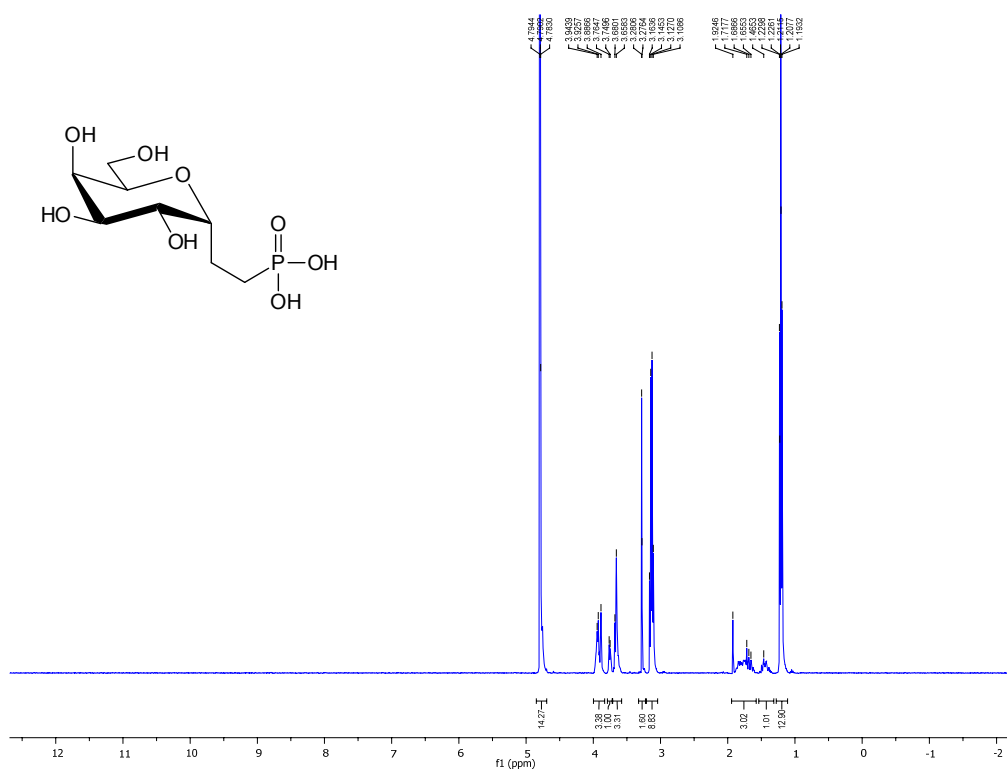 $^{31}\text{P}$  NMR ( $\text{D}_2\text{O}$ ):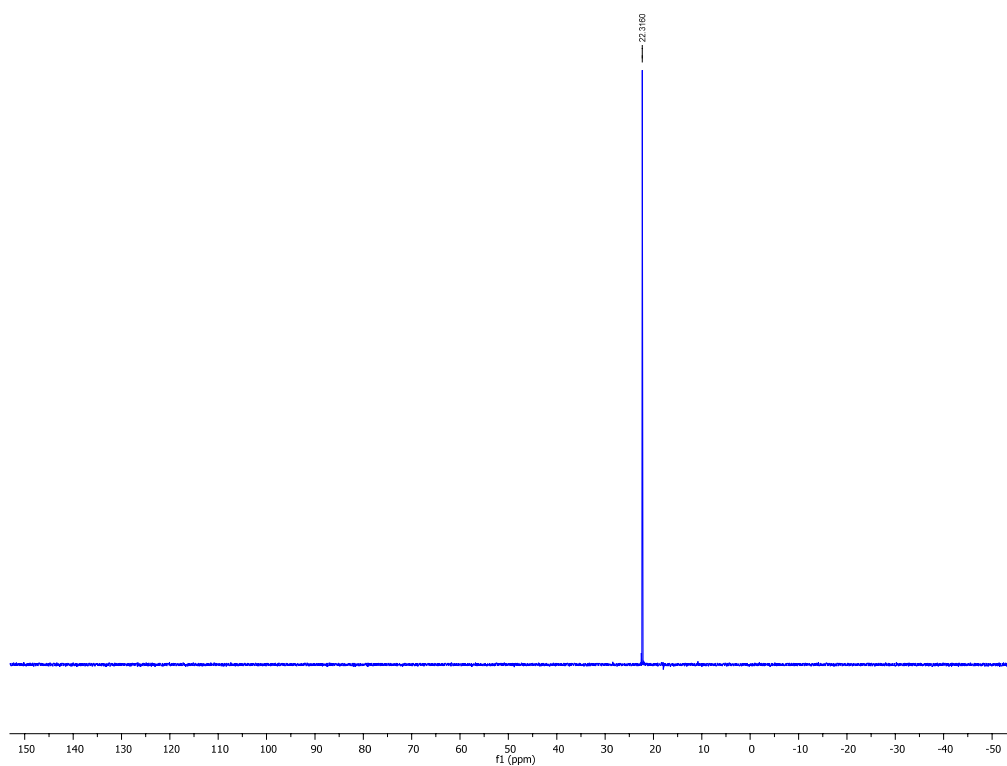

$^{13}\text{C}$  NMR ( $\text{D}_2\text{O}$ ):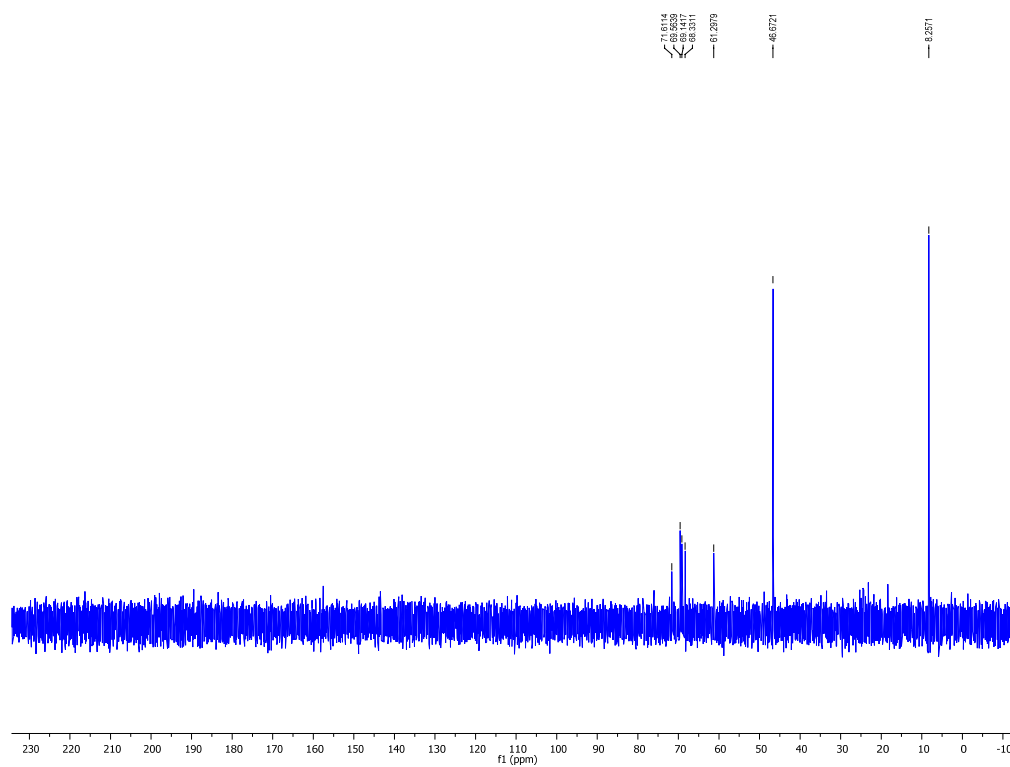

**5-(5-Formylthien-2-yl) UMP phosphoramorpholidate (9)** $^1\text{H}$  NMR ( $\text{D}_2\text{O}$ ):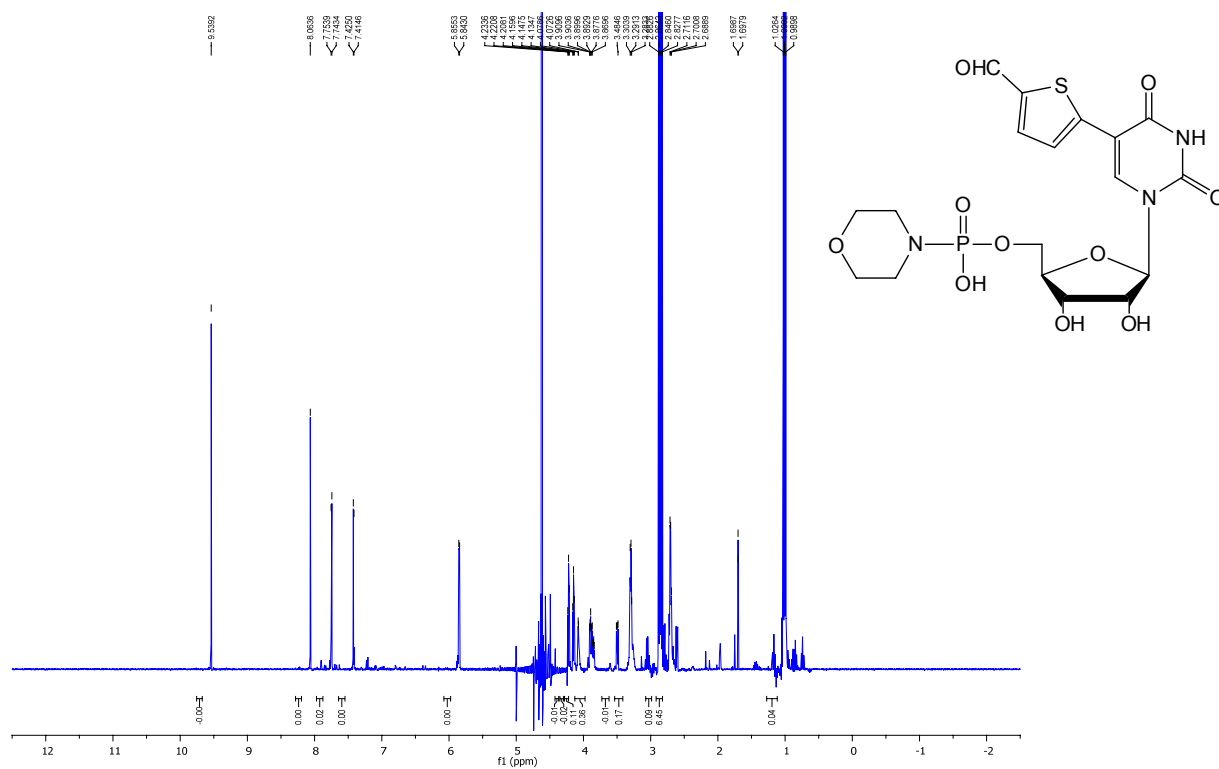 $^{31}\text{P}$  NMR ( $\text{D}_2\text{O}$ ):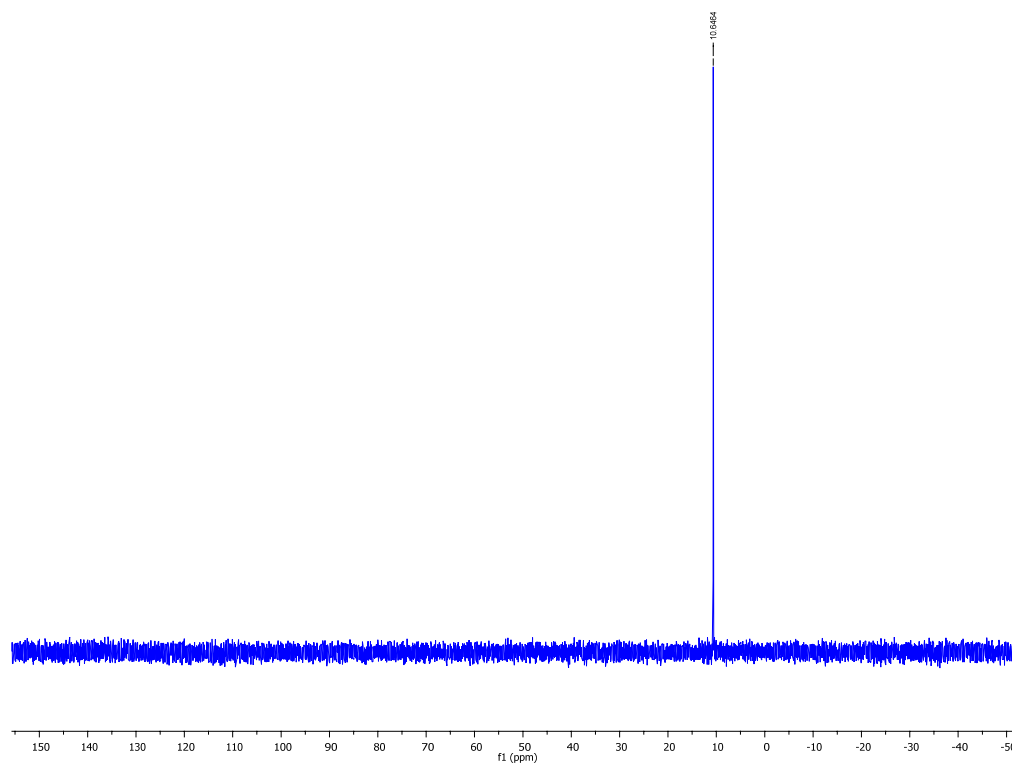

**5-Iodo UMP phosphoramorpholidate (11)** $^1\text{H}$  NMR ( $\text{D}_2\text{O}$ ):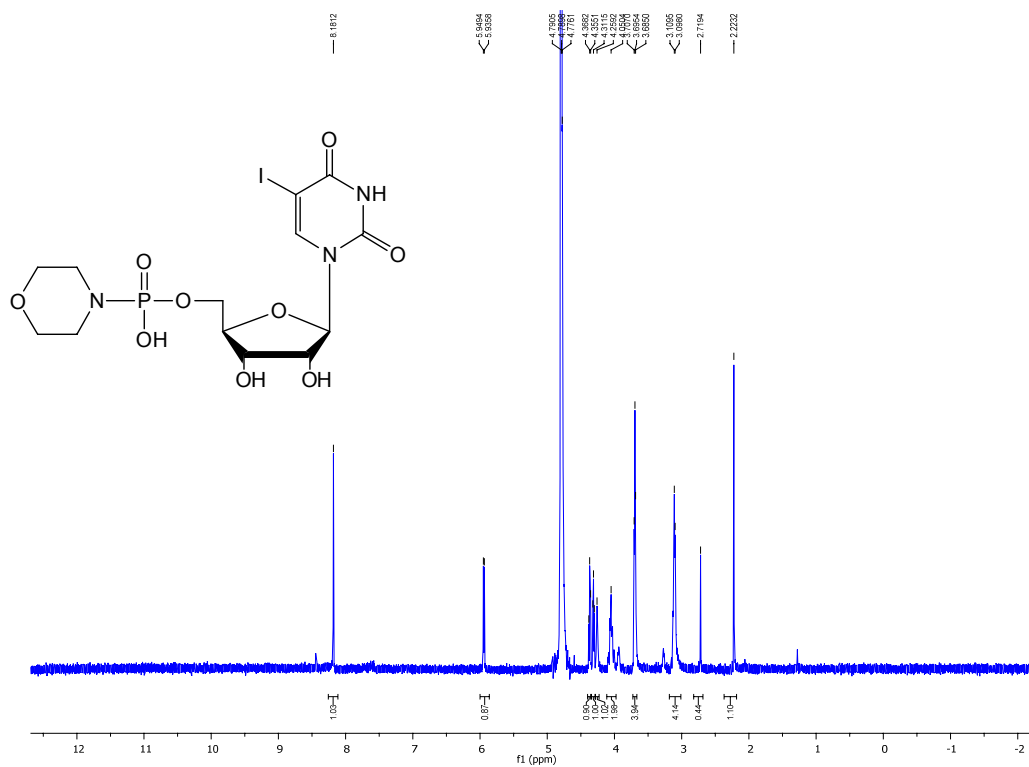 $^{31}\text{P}$  NMR ( $\text{D}_2\text{O}$ ):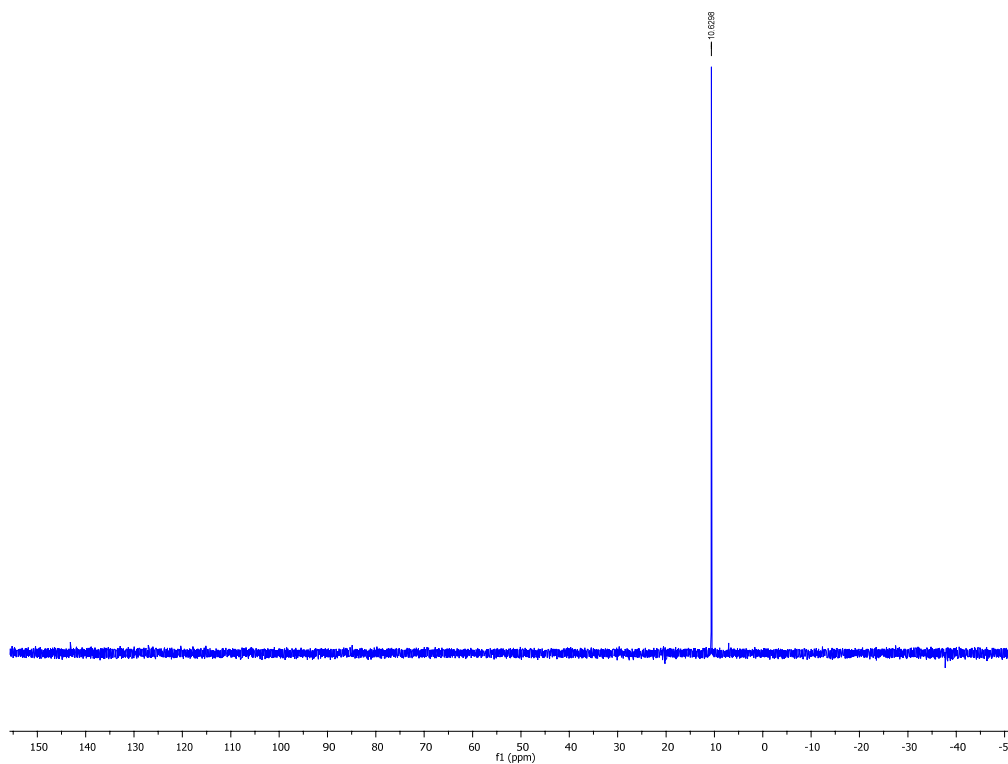

**Bis(triethylammonium) [2-( $\alpha$ -D-glucopyranosyl)-ethylphosphono]-5-iodouridin-5'-yl phosphate (12)** $^1\text{H}$  NMR ( $\text{D}_2\text{O}$ ):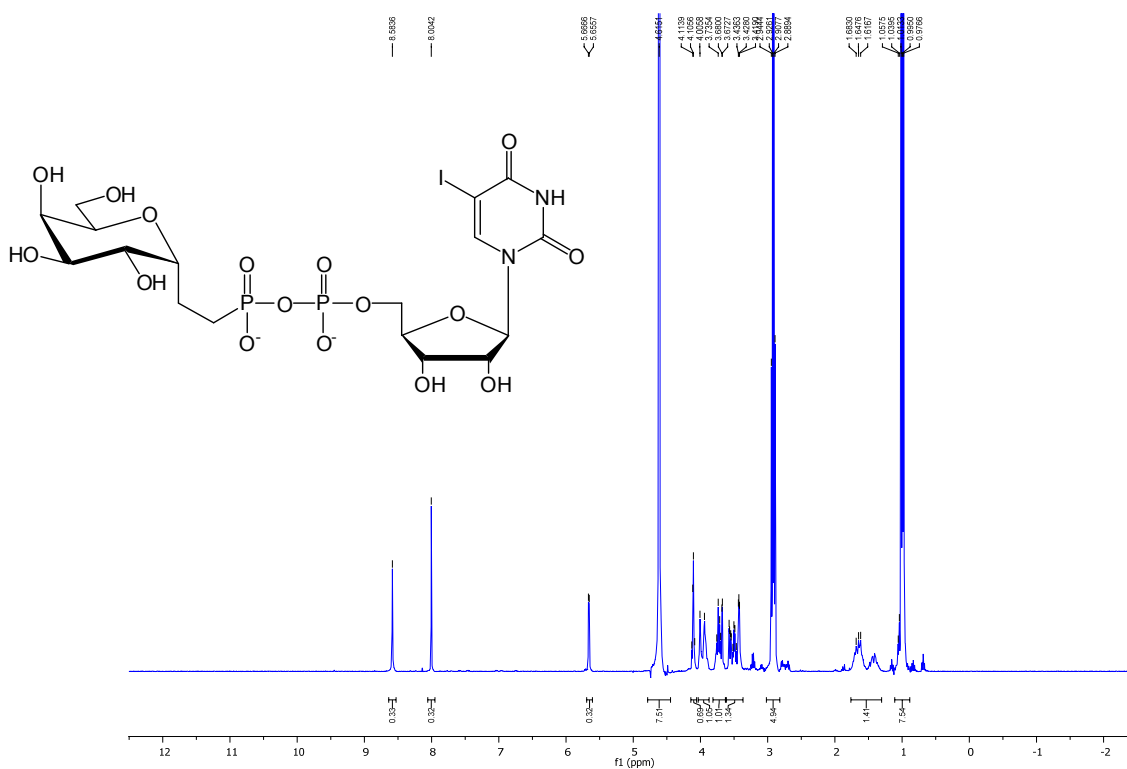 $^{31}\text{P}$  NMR ( $\text{D}_2\text{O}$ ):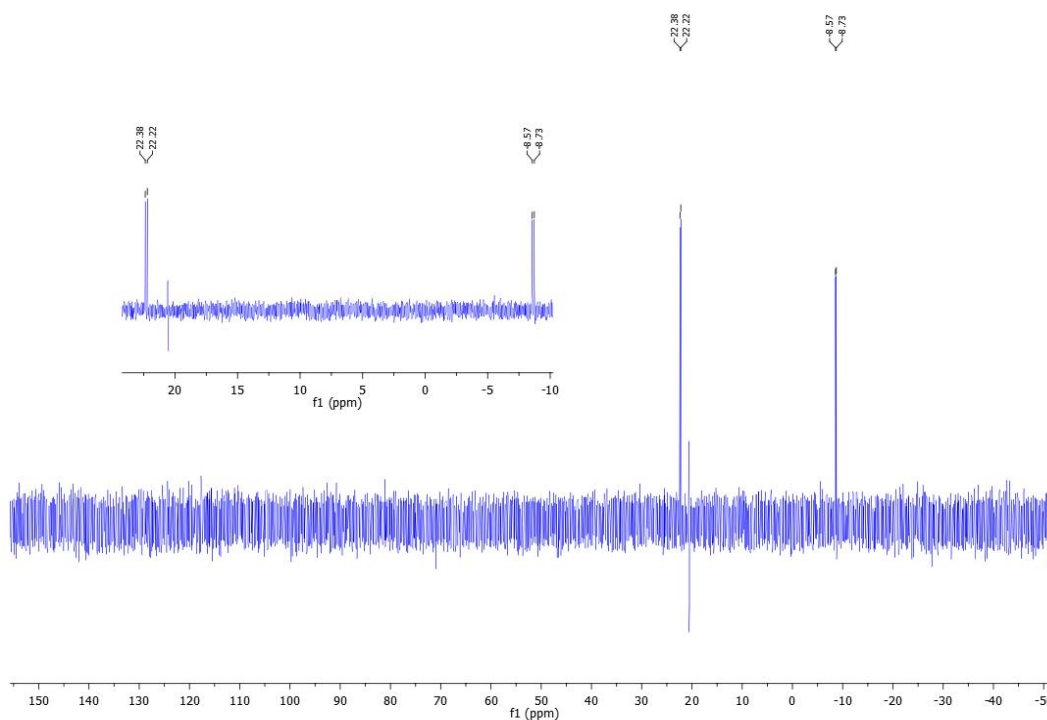

$^{13}\text{C}$  NMR ( $\text{D}_2\text{O}$ ):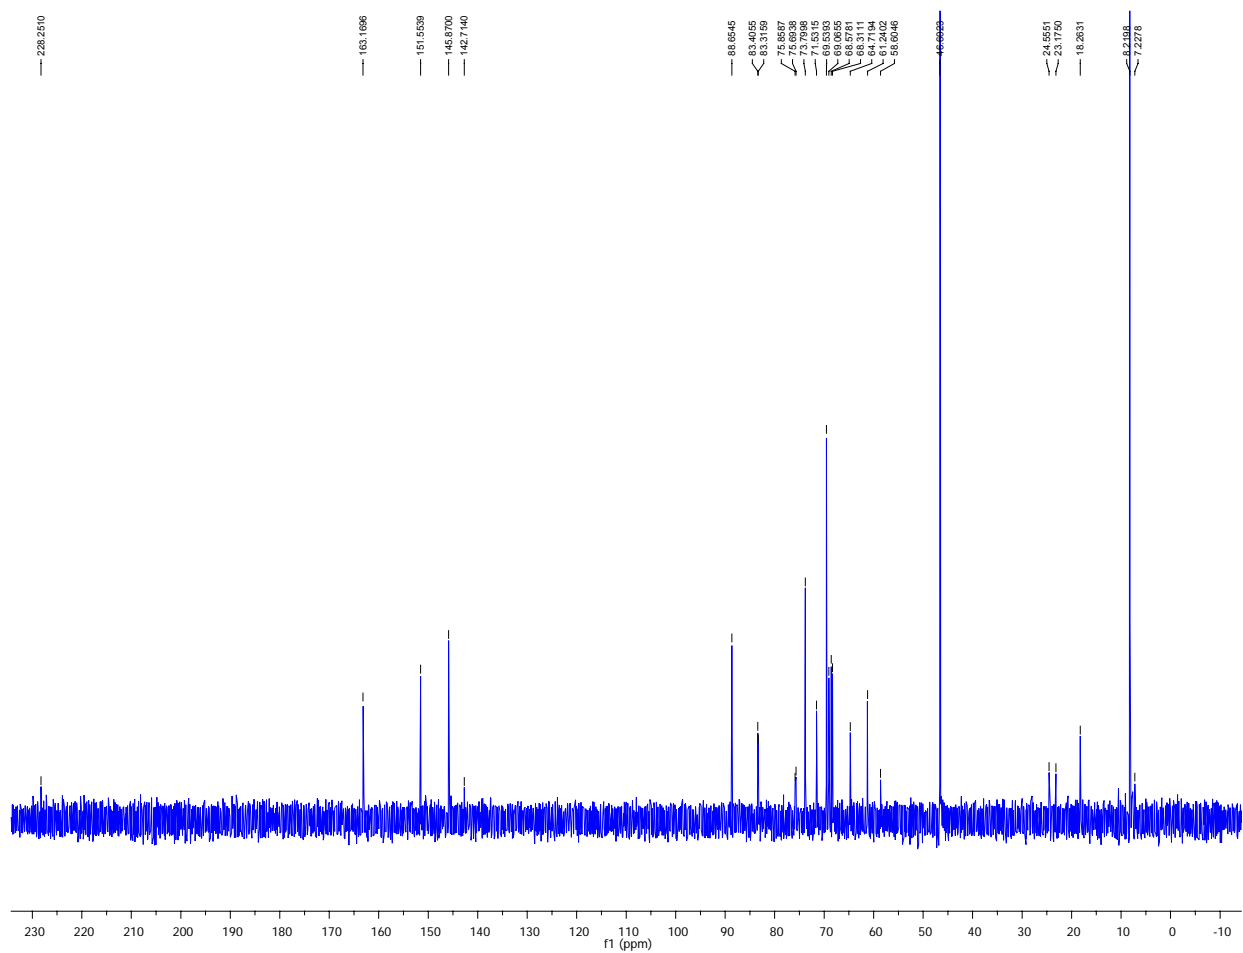

Supplement: c0ob00630k.pdf [file c0ob00630k.pdf]
